# Supplementary material for: In situ construction of Ohmic/Schottky-type MoS2/Sv-ZnIn2S4/Cu(OH)2 dual-junction photocatalysts with enhanced water splitting into hydrogen generation activity
Source: Royal Society of Chemistry journal article supplement (doi:10.1039/d4ta00773e), 2024-01-01
Supplement: d4ta00773e1.pdf [file d4ta00773e1.pdf]

## Supporting Information

### In-Situ Construction of Ohmic/Schottky-Type MoS<sub>2</sub>/S<sub>v</sub>-ZnIn<sub>2</sub>S<sub>4</sub>/Cu(OH)<sub>2</sub> Dual-Junction

#### Photocatalysts with Boosting Water Splitting into Hydrogen Generation Activity

Aihua Yan<sup>1,2</sup>, Tongyang Zhang<sup>1,2</sup>, Fei Huang<sup>2,3,\*</sup>, Shijian Lu<sup>3</sup>, Quande Wang<sup>3</sup>, Huaqi Yuan<sup>2</sup>, Ye Gao<sup>2</sup>,

Wenxue Zhao<sup>2</sup>, Jixu Zhang<sup>2</sup>, and Zigao Su<sup>2</sup>

<sup>1</sup> School of Low-Carbon Energy and Power Engineering, China University of Mining and Technology,

Xuzhou 221116, China

<sup>2</sup> School of Materials and Physics, China University of Mining and Technology, Xuzhou 221116, China

<sup>3</sup> Jiangsu Key Laboratory of Coal-based Greenhouse Gas Control and Utilization, Carbon Neutrality

Institute, China University of Mining and Technology, Xuzhou 221008, China

\* **Corresponding authors.** Fax: +86-516-83883501

Email: [huangfei7804@163.com](mailto:huangfei7804@163.com), <https://orcid.org/0000-0002-3805-8107> (Fei Huang)

## Table of Contents

|      |                                                                                  |        |
|------|----------------------------------------------------------------------------------|--------|
| S1.  | Structural Characterization of CMO .....                                         | - 1 -  |
| S2.  | FESEM Images .....                                                               | - 2 -  |
| S3.  | XRD Patterns of ZIS and CMO-x/ZIS .....                                          | - 3 -  |
| S4.  | XPS Characterization .....                                                       | - 4 -  |
| S5.  | Hydrogen Evolution Rate of Photocatalysts .....                                  | - 6 -  |
| S6.  | XRD、SEM、TEM and XPS Results of Initial and Irradiated Photocatalysts .....       | - 5 -  |
| S7.  | Calculated <i>AQE</i> Values .....                                               | - 8 -  |
| S8.  | Photogenerated Charge Carrier Dynamics .....                                     | - 11 - |
| S9.  | Calculated TRPL Data .....                                                       | - 12 - |
| S10. | UV-vis Absorption Spectra and Tauc's Plots .....                                 | - 13 - |
| S11. | Absorption Edges and Band Gaps of Different Samples .....                        | - 14 - |
| S12. | Optical Images of Different Photocatalysts .....                                 | - 15 - |
| S13. | Carrier Concentration .....                                                      | - 16 - |
| S14. | UPS Results .....                                                                | - 17 - |
| S15. | Narrow-scanned Zn 2 <i>p</i> , Cu 2 <i>p</i> and Mo 3 <i>d</i> XPS Spectra ..... | - 18 - |

## 1. Structural Characterization of CMO

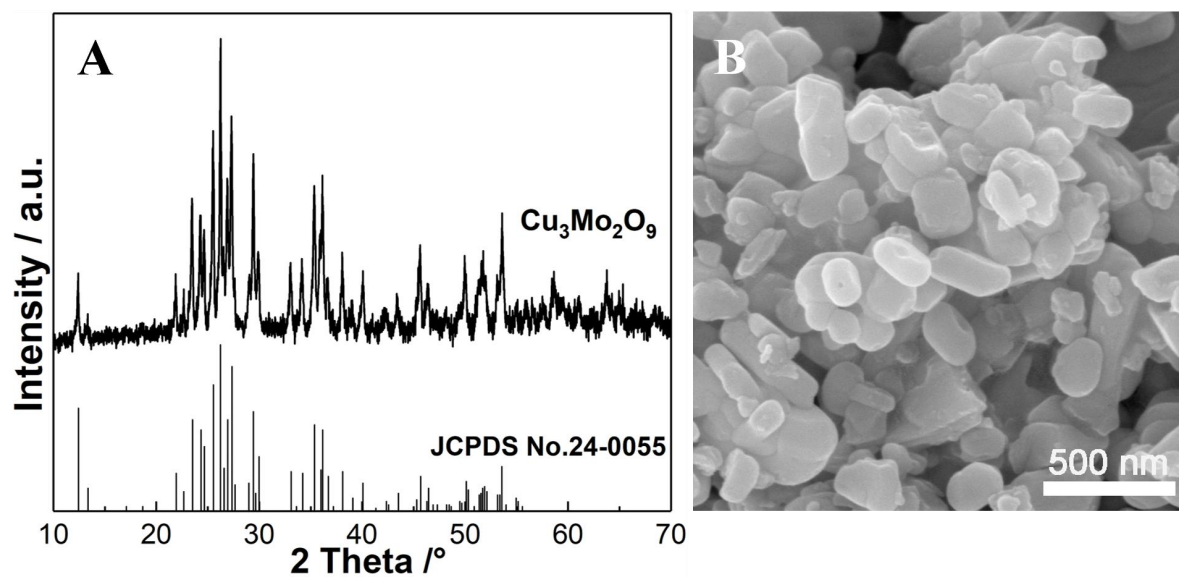

**Figure S1** (A) XRD pattern and (B) FESEM image of pristine CMO.

## 2. FESEM Images

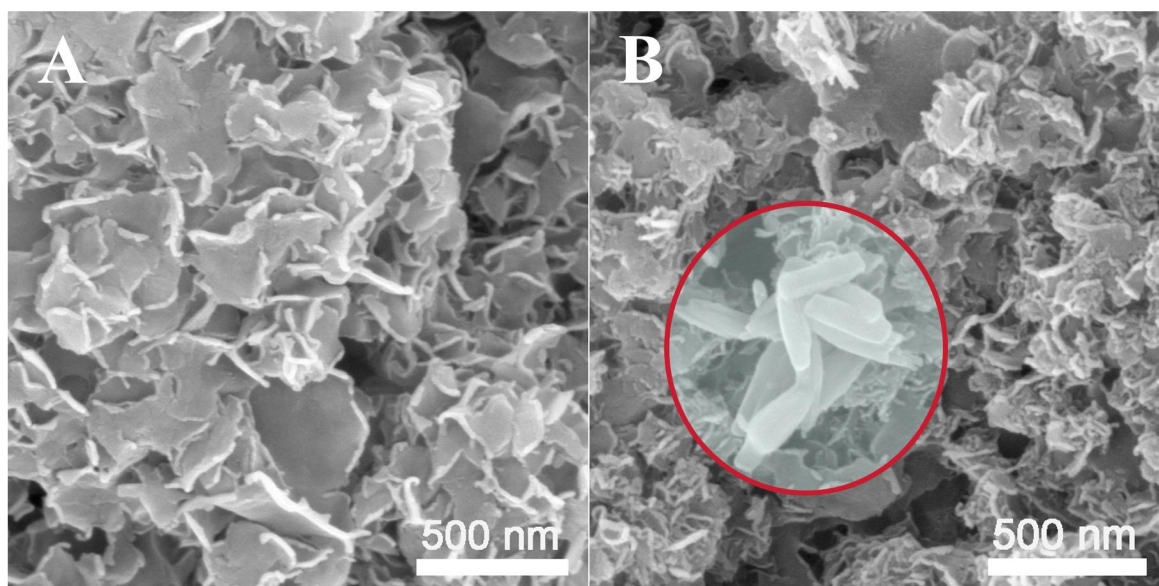

**Figure S2.** Typical FESEM images of (A) CMO-0.2/ZIS and (B) CMO-2.0/ZIS.

### 3. XRD Patterns of ZIS and CMO-x/ZIS

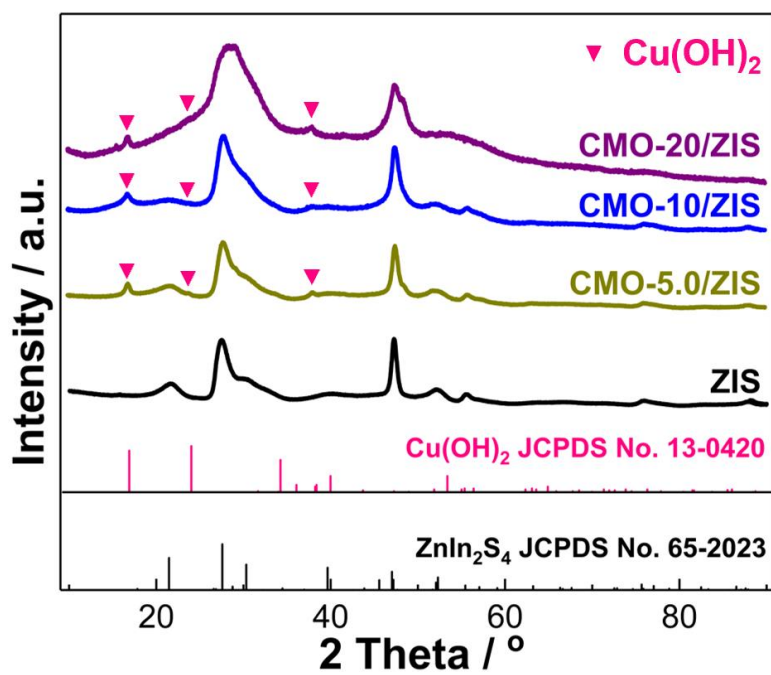

**Figure S3** XRD patterns of pristine ZIS and CMO-x/ZIS samples.

#### 4. XPS Characterization

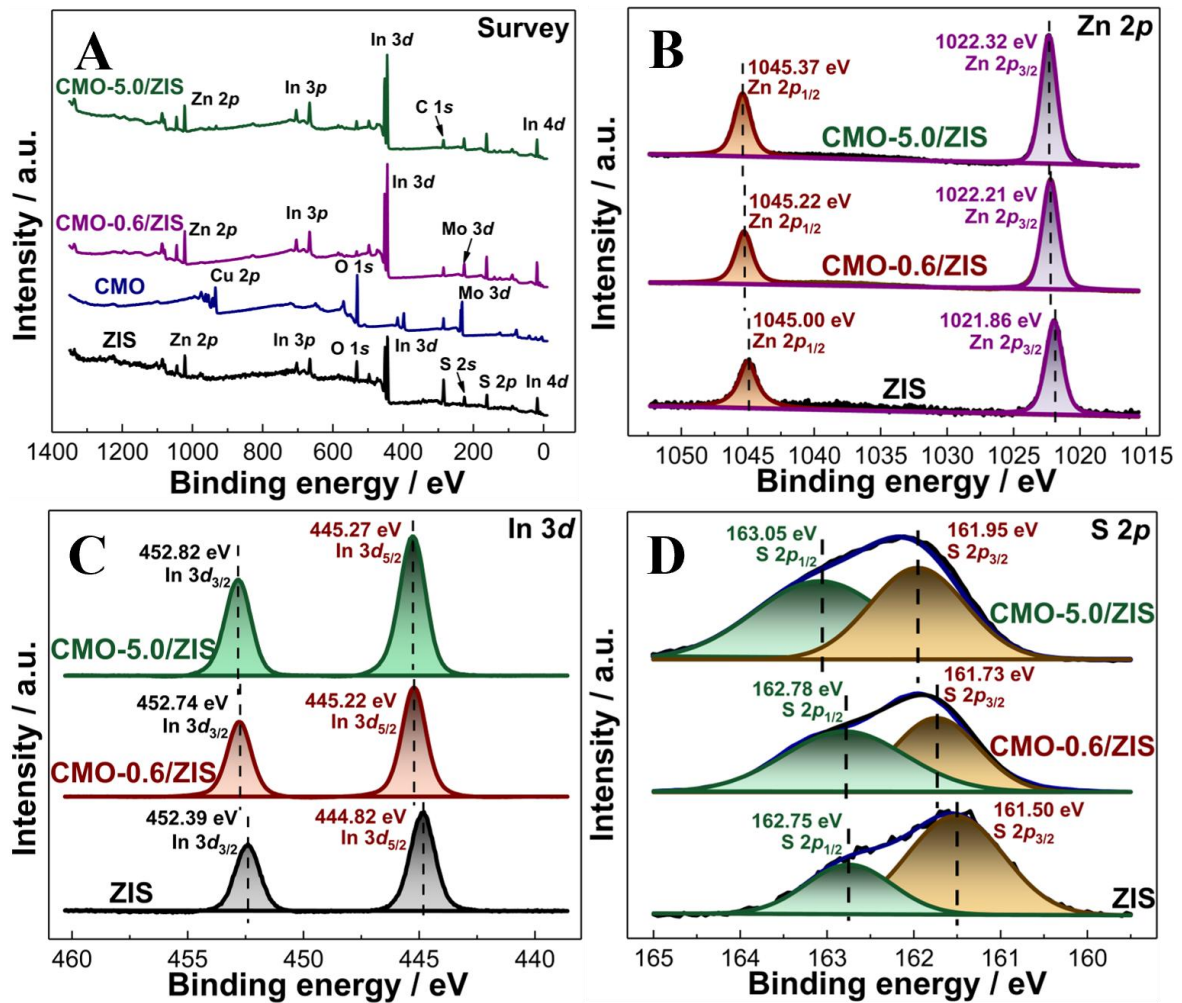

**Figure S4** (A) XPS survey spectra of pristine ZIS, pristine CMO, CMO-0.6/ZIS and CMO-5.0/ZIS samples; narrow-scanned XPS spectra of (B) Zn 2p, (C) In 3d and (D) S 2p for different samples.

## 5. Hydrogen Evolution Rates of Photocatalysts

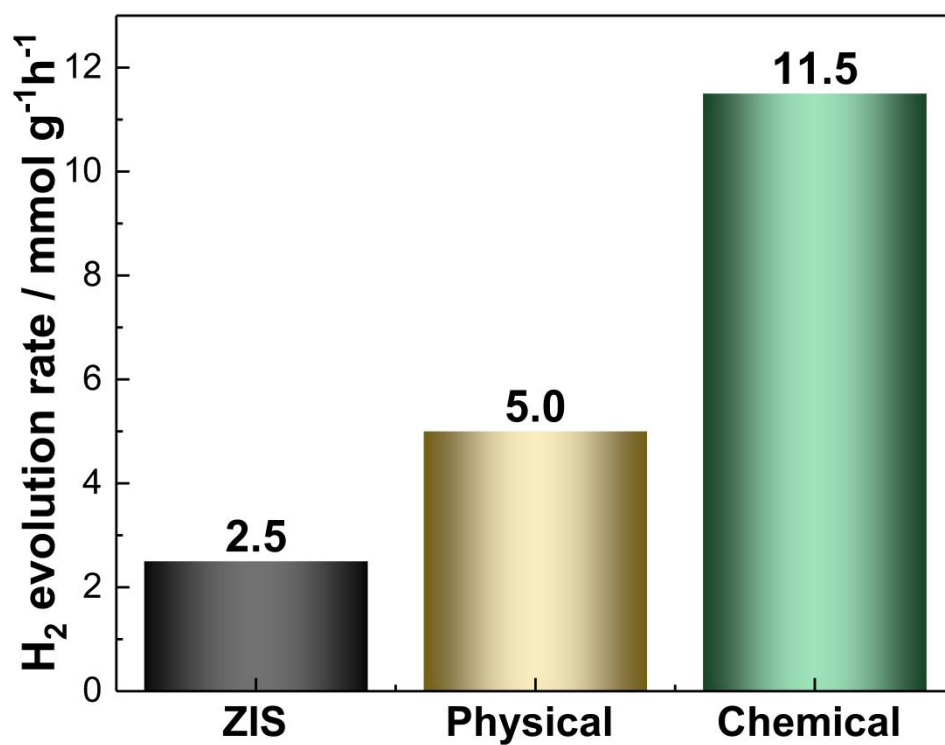

Figure S5. Hydrogen evolution rates of the catalyst prepared by different methods.

## 6. XRD、SEM、TEM and XPS Results of Initial and Irradiated Photocatalysts

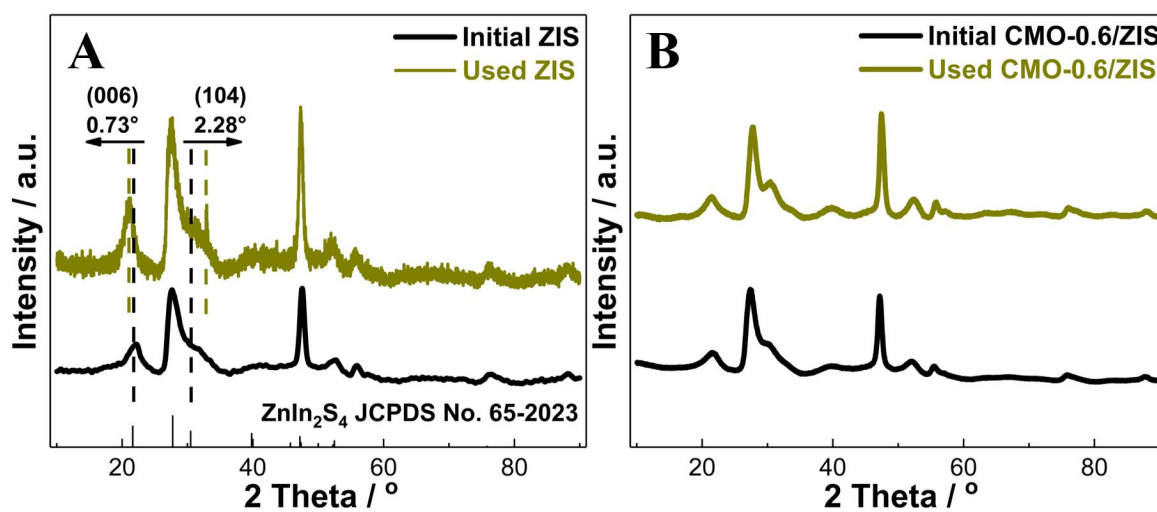

**Figure S6.** XRD patterns of (A) initial ZIS & irradiated ZIS for four runs and (B) initial CMO-0.6/ZIS & irradiated CMO-0.6/ZIS for four runs.

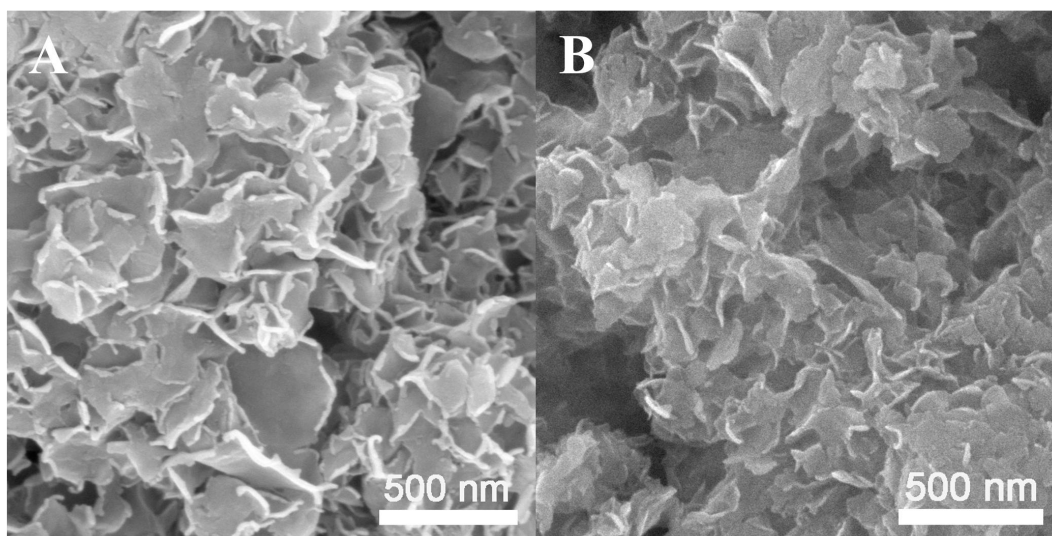

**Figure S7.** FESEM images of (A) initial CMO-0.6/ZIS and (B) irradiated CMO-0.6/ZIS for four runs.



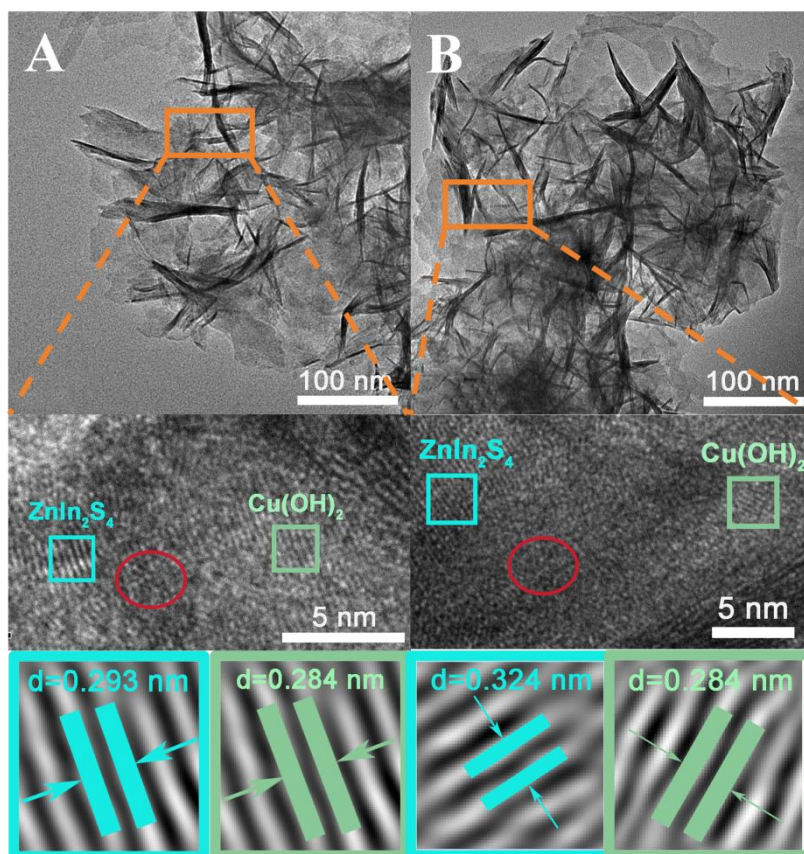

**Figure S8.** HRTEM images of (A) initial CMO-0.6/ZIS and (B) irradiated CMO-0.6/ZIS for four runs.

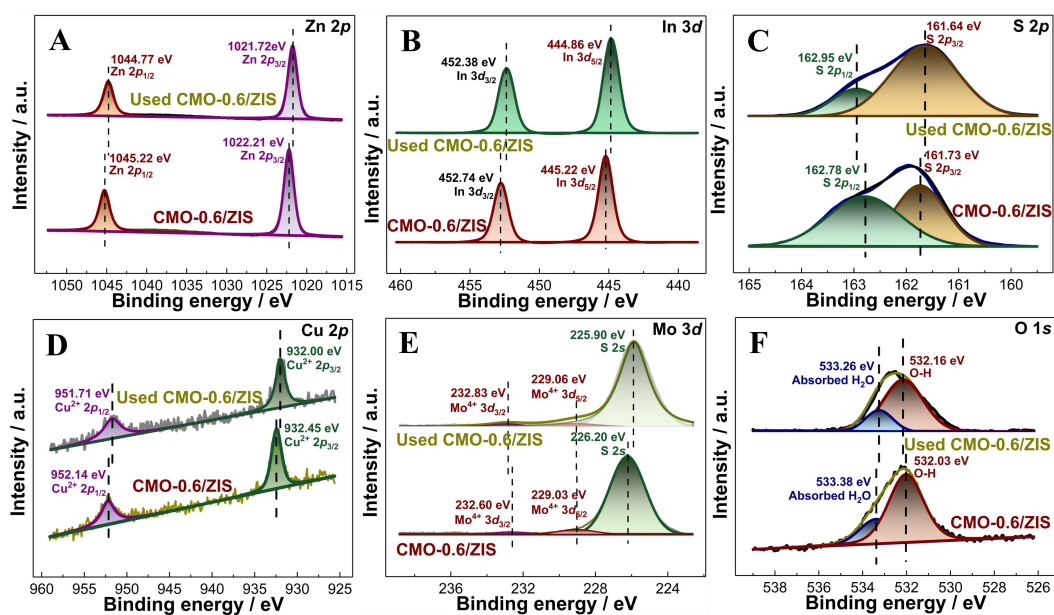

**Figure S9.** XPS patterns of initial CMO-0.6/ZIS and irradiated CMO-0.6/ZIS for four runs.

## 7. Calculated *AQE* Values

**Table S1** *AQE* values of pristine ZIS and CMO-0.6/ZIS catalysts at different wavelengths.

| <i>AQE</i> | ZIS   | CMO-0.6/ZIS |
|------------|-------|-------------|
| 420 nm     | 1.82% | 2.15%       |
| 450 nm     | 1.02% | 2.15%       |
| 475 nm     | 0.23% | 1.54%       |
| 500 nm     | 0.04% | 0.66%       |

*AQE* measurement was carried out under the same reaction conditions as photocatalytic hydrogen production experiments except that the incident light was supplied by a 300W Xe lamp equipped with specific band-pass filters to get the monochromatic incident wavelength ( $\lambda = 420, 450, 475$  and  $500$  nm). *AQE* values for pristine ZIS and CMO-0.6/ZIS samples were roughly calculated as follows:

### (1) $\lambda = 420$ nm

ZIS:

$$\begin{aligned}
 N &= \frac{E\lambda}{hc} = \frac{10.4 \times 5.28 \times 10^{-3} \times 3 \times 3600 \times 420 \times 10^{-9}}{6.626 \times 10^{-34} \times 3 \times 10^8} = 12.53 \times 10^{20} \\
 \text{AQE} &= \frac{\text{the number of reacted electrons}}{\text{the number of incident photons}} \times 100\% \\
 &= \frac{2 \times \text{the number of evolved H}_2 \text{ molecules}}{N} \times 100\% \\
 &= \frac{2 \times 6.02 \times 10^{23} \times 18.9 \times 10^{-6}}{12.53 \times 10^{20}} \times 100\% = 1.82\%
 \end{aligned}$$

CMO-0.6/ZIS:

$$\begin{aligned}
 N &= \frac{E\lambda}{hc} = \frac{10.4 \times 5.28 \times 10^{-3} \times 3 \times 3600 \times 420 \times 10^{-9}}{6.626 \times 10^{-34} \times 3 \times 10^8} = 12.53 \times 10^{20} \\
 \text{AQE} &= \frac{\text{the number of reacted electrons}}{\text{the number of incident photons}} \times 100\% \\
 &= \frac{2 \times \text{the number of evolved H}_2 \text{ molecules}}{N} \times 100\%
 \end{aligned}$$

$$= \frac{2 \times 6.02 \times 10^{23} \times 22.36 \times 10^{-6}}{12.53 \times 10^{20}} \times 100\% = 2.15\%$$

**(2)  $\lambda = 450 \text{ nm}$**

ZIS:

$$N = \frac{E\lambda}{hc} = \frac{9.7 \times 5.28 \times 10^{-3} \times 3 \times 3600 \times 450 \times 10^{-9}}{6.626 \times 10^{-34} \times 3 \times 10^8} = 12.52 \times 10^{20}$$

$$\text{AQE} = \frac{\text{the number of reacted electrons}}{\text{the number of incident photons}} \times 100\%$$

$$= \frac{2 \times \text{the number of evolved H}_2 \text{ molecules}}{N} \times 100\%$$

$$= \frac{2 \times 6.02 \times 10^{23} \times 10.61 \times 10^{-6}}{12.52 \times 10^{20}} \times 100\% = 1.02\%$$

CMO-0.6/ZIS:

$$N = \frac{E\lambda}{hc} = \frac{9.7 \times 5.28 \times 10^{-3} \times 3 \times 3600 \times 450 \times 10^{-9}}{6.626 \times 10^{-34} \times 3 \times 10^8} = 12.52 \times 10^{20}$$

$$\text{AQE} = \frac{\text{the number of reacted electrons}}{\text{the number of incident photons}} \times 100\%$$

$$= \frac{2 \times \text{the number of evolved H}_2 \text{ molecules}}{N} \times 100\%$$

$$= \frac{2 \times 6.02 \times 10^{23} \times 22.32 \times 10^{-6}}{12.52 \times 10^{20}} \times 100\% = 2.15\%$$

**(3)  $\lambda = 475 \text{ nm}$**

ZIS:

$$N = \frac{E\lambda}{hc} = \frac{18.5 \times 5.28 \times 10^{-3} \times 3 \times 3600 \times 475 \times 10^{-9}}{6.626 \times 10^{-34} \times 3 \times 10^8} = 25.21 \times 10^{20}$$

$$\text{AQE} = \frac{\text{the number of reacted electrons}}{\text{the number of incident photons}} \times 100\%$$

$$= \frac{2 \times \text{the number of evolved H}_2 \text{ molecules}}{N} \times 100\%$$

$$= \frac{2 \times 6.02 \times 10^{23} \times 4.88 \times 10^{-6}}{25.21 \times 10^{20}} \times 100\% = 0.23\%$$

CMO-0.6/ZIS:

$$N = \frac{E\lambda}{hc} = \frac{18.5 \times 5.28 \times 10^{-3} \times 3 \times 3600 \times 475 \times 10^{-9}}{6.626 \times 10^{-34} \times 3 \times 10^8} = 25.21 \times 10^{20}$$

$$\text{AQE} = \frac{\text{the number of reacted electrons}}{\text{the number of incident photons}} \times 100\%$$

$$= \frac{2 \times \text{the number of evolved H}_2 \text{ molecules}}{N} \times 100\%$$

$$= \frac{2 \times 6.02 \times 10^{23} \times 32.21 \times 10^{-6}}{25.21 \times 10^{20}} \times 100\% = 1.54\%$$

(4)  $\lambda = 500 \text{ nm}$

ZIS:

$$N = \frac{E\lambda}{hc} = \frac{15.4 \times 5.28 \times 10^{-3} \times 3 \times 3600 \times 500 \times 10^{-9}}{6.626 \times 10^{-34} \times 3 \times 10^8} = 22.09 \times 10^{20}$$

$$\text{AQE} = \frac{\text{the number of reacted electrons}}{\text{the number of incident photons}} \times 100\%$$

$$= \frac{2 \times \text{the number of evolved H}_2 \text{ molecules}}{N} \times 100\%$$

$$= \frac{2 \times 6.02 \times 10^{23} \times 0.649 \times 10^{-6}}{22.09 \times 10^{20}} \times 100\% = 0.04\%$$

CMO-0.6/ZIS:

$$N = \frac{E\lambda}{hc} = \frac{15.4 \times 5.28 \times 10^{-3} \times 3 \times 3600 \times 500 \times 10^{-9}}{6.626 \times 10^{-34} \times 3 \times 10^8} = 22.09 \times 10^{20}$$

$$\text{AQE} = \frac{\text{the number of reacted electrons}}{\text{the number of incident photons}} \times 100\%$$

$$= \frac{2 \times \text{the number of evolved H}_2 \text{ molecules}}{N} \times 100\%$$

$$= \frac{2 \times 6.02 \times 10^{23} \times 12.1 \times 10^{-6}}{22.09 \times 10^{20}} \times 100\% = 0.66\%$$

## 8. Photogenerated Charge Carrier Dynamics

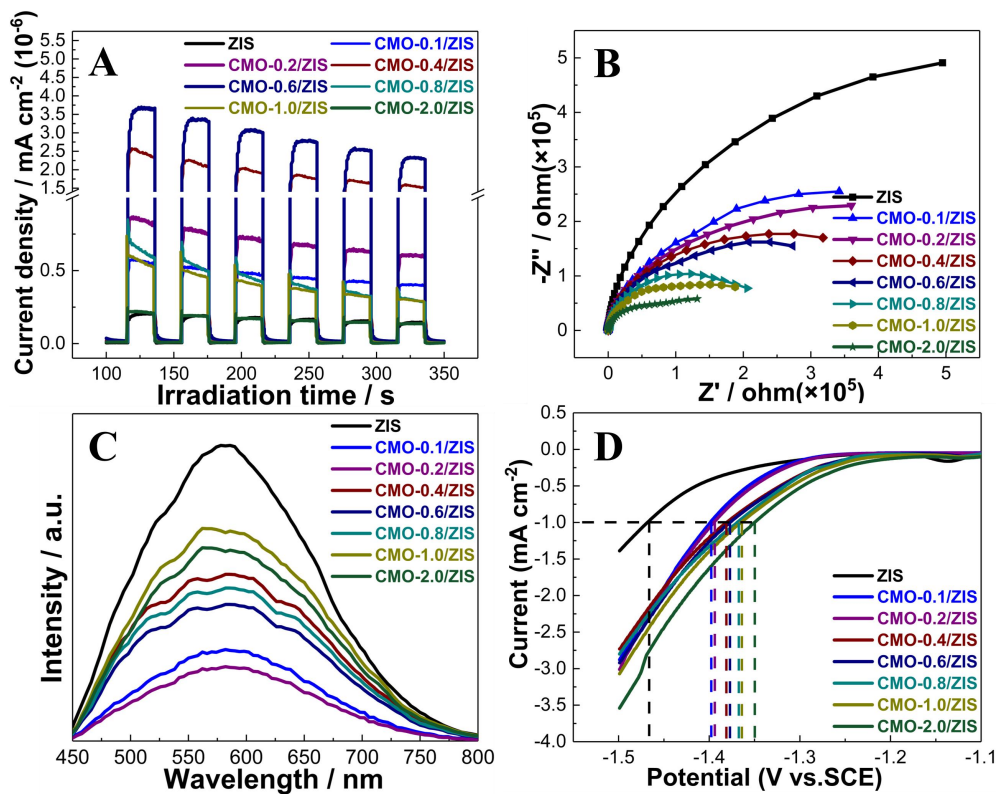

**Figure S10.** Photoelectronic dynamics characterization. (A) Transient photocurrent curves, (B) EIS Nyquist plots, (C) steady-state PL spectra, (D) LSV curves of different photocatalysts.

## 9. Calculated TRPL Data

**Table S2** The summary of TRPL.

|             | $\tau_1$ | $A_1$ | $\tau_2$ | $A_2$ | $\tau_{ave}$ |
|-------------|----------|-------|----------|-------|--------------|
| ZIS         | 0.91     | 0.54  | 30.87    | 0.30  | 29.36        |
| CMO-0.2/ZIS | 1.04     | 0.67  | 39.63    | 0.26  | 37.19        |
| CMO-0.6/ZIS | 0.95     | 0.54  | 53.70    | 0.37  | 52.37        |
| CMO-2.0/ZIS | 1.32     | 0.47  | 37.43    | 0.35  | 35.80        |

**Notes:** The average PL emission lifetime ( $\tau_{ave}$ ) could be calculated according to the following

formula: 
$$\tau_{ave} = \frac{A_1\tau_1^2 + A_2\tau_2^2}{A_1\tau_1 + A_2\tau_2}$$

## 10. UV-vis Absorption Spectra and Tauc's Plots

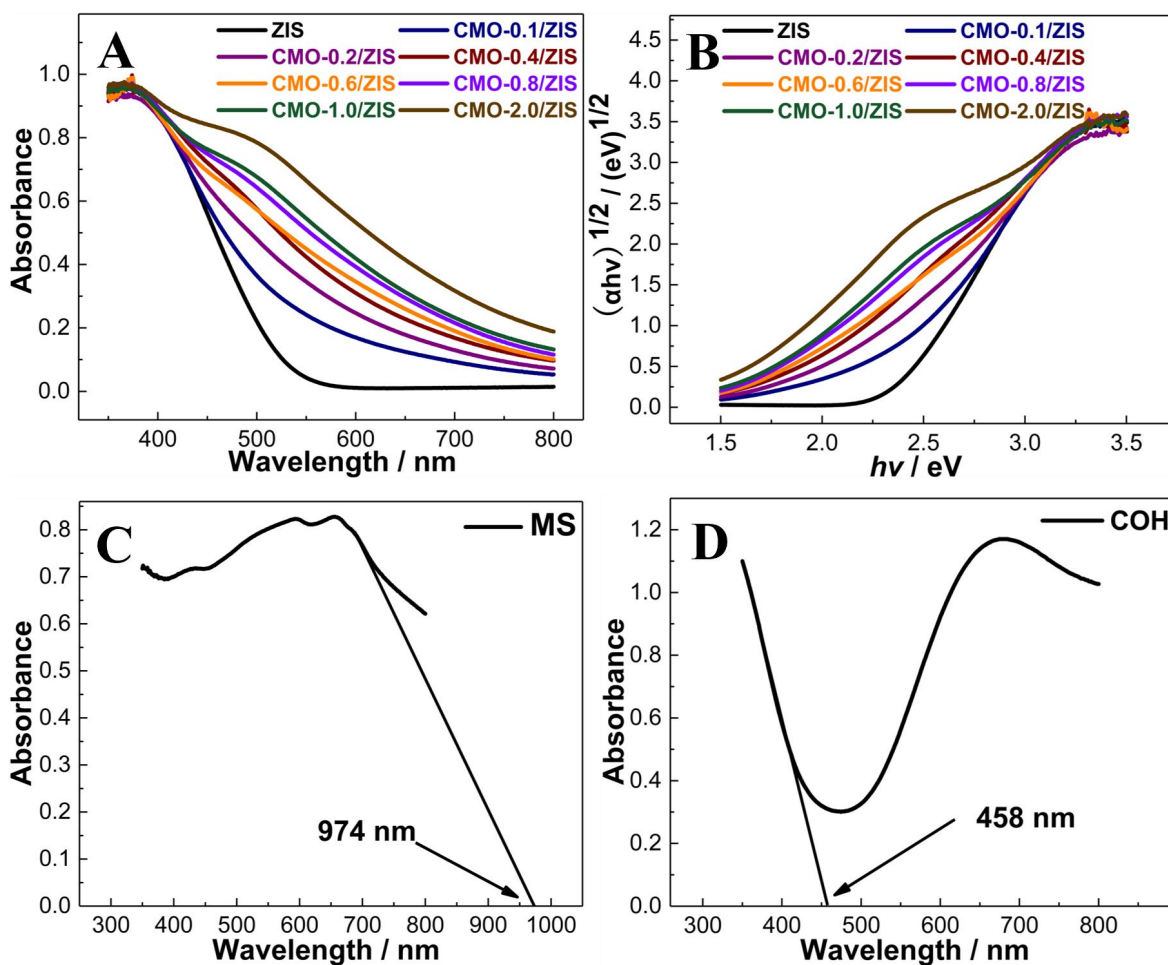

**Figure S11.** (A) UV-vis absorption spectra and (B) Tauc's plots of CMO-x/ZIS composite; UV-vis absorption spectra of (C) MS and (D) COH.

## 11. Absorption Edges and Band Gaps of Different Samples

**Table S3** Absorption edges and band gaps of ZIS, MS, COH and CMO-x/ZIS samples.

| <b>Samples</b>     | <b>Band gaps / eV</b> | <b>Absorption edges / nm</b> |
|--------------------|-----------------------|------------------------------|
| <b>ZIS</b>         | 2.38                  | 522                          |
| <b>MS</b>          | 1.27                  | 974                          |
| <b>COH</b>         | 2.70                  | 458                          |
| <b>CMO-0.1/ZIS</b> | 2.29                  | 543                          |
| <b>CMO-0.2/ZIS</b> | 2.09                  | 596                          |
| <b>CMO-0.4/ZIS</b> | 1.90                  | 653                          |
| <b>CMO-0.6/ZIS</b> | 1.86                  | 667                          |
| <b>CMO-0.8/ZIS</b> | 1.82                  | 683                          |
| <b>CMO-1.0/ZIS</b> | 1.77                  | 699                          |
| <b>CMO-2.0/ZIS</b> | 1.62                  | 767                          |



## 12. Optical Images of Different Photocatalysts

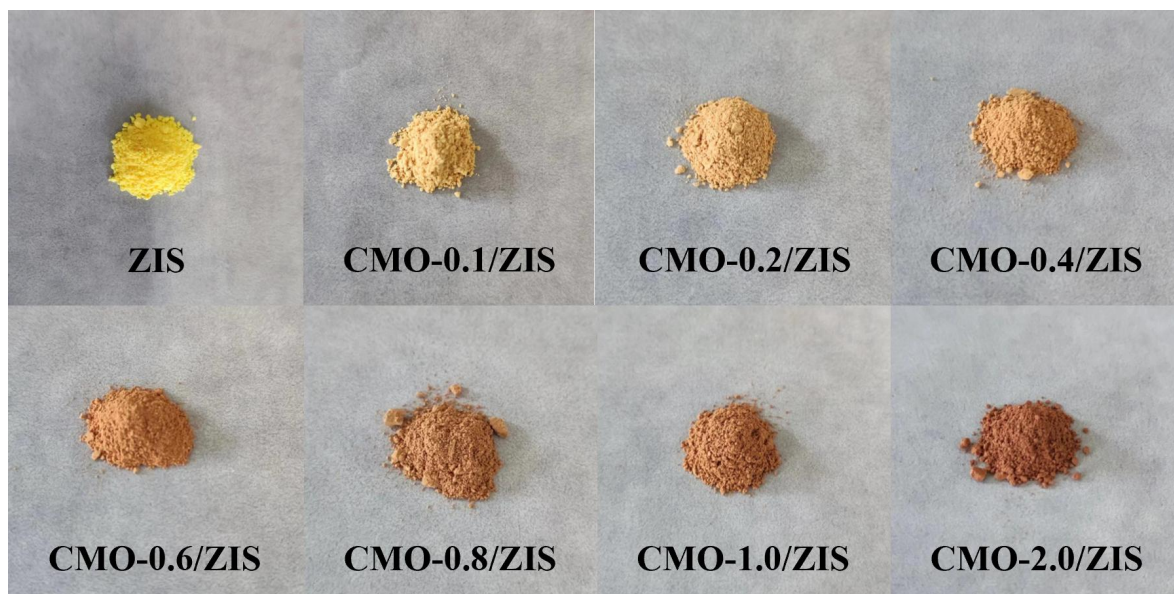

**Figure S12.** Optical images of different photocatalysts.

### 13. Carrier Concentration

**Table S4** The summary of carrier concentration.

| Samples     | N <sub>d</sub> -500 /<br>cm <sup>-3</sup> (10 <sup>23</sup> ) | N <sub>d</sub> -800 /<br>cm <sup>-3</sup> (10 <sup>23</sup> ) | N <sub>d</sub> -1000 /<br>cm <sup>-3</sup> (10 <sup>23</sup> ) | N <sub>d</sub> -ave /<br>cm <sup>-3</sup> (10 <sup>23</sup> ) |
|-------------|---------------------------------------------------------------|---------------------------------------------------------------|----------------------------------------------------------------|---------------------------------------------------------------|
| ZIS         | 2.88                                                          | 2.39                                                          | 1.96                                                           | 2.41                                                          |
| CMO-0.6/ZIS | 4.09                                                          | 3.30                                                          | 2.57                                                           | 3.32                                                          |
| CMO-0.6/ZIS | 4.06                                                          | 2.81                                                          | 2.27                                                           | 3.05                                                          |
| CMO-0.6/ZIS | 3.88                                                          | 2.54                                                          | 2.00                                                           | 2.81                                                          |

**Notes:** The carrier concentration (N<sub>d</sub>) could be determined using the following equation:

$$N_d = \left( \frac{2}{e\epsilon\epsilon_0} \right) \left[ \frac{d(E_s)}{d\left(\frac{1}{c^2}\right)} \right]$$

where  $e = 1.6 \times 10^{-19}$  C,  $\epsilon_0 = 8.86 \times 10^{-14}$  F cm<sup>-1</sup>,  $\epsilon = 4.7$ .

## 14. UPS Results

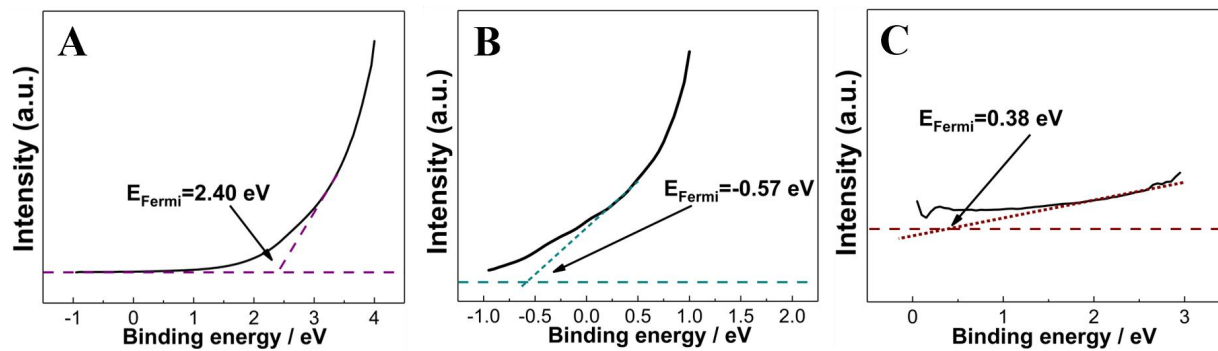

**Figure S13.** Magnified UPS views of (A) pristine ZIS (B) pristine MS (C) pristine COH.

## 15. Narrow-scanned Zn 2p , Cu 2p and Mo 3d XPS Spectra

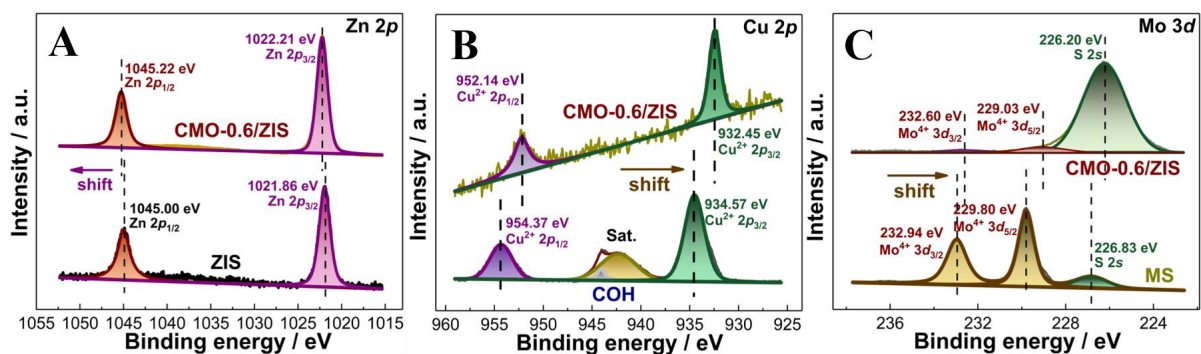

**Figure S14.** (A) Narrow-scanned Zn 2p XPS spectra of pristine ZIS and CMO-0.6/ZIS; (B) narrow-scanned Cu 2p XPS spectra of pristine COH and CMO-0.6/ZIS; (C) narrow-scanned Mo 3d XPS spectra of pristine MS and CMO-0.6/ZIS.
